# Supplementary material for: Huaier polysaccharide inhibits the stem-like characteristics of ERα-36high triple negative breast cancer cells via inactivation of the ERα-36 signaling pathway
Source: PubMed Central journal article supplement — Int J Biol Sci. 2019 May 20;15(7):1358–67. doi: 10.7150/ijbs.27360 (PMC6643138; doi:10.7150/ijbs.27360), 2019-05-20
Supplement: ijbsv15p1358s1.pdf [file ijbsv15p1358s1.pdf]

## Supplementary tables

**Table S1 The sequences of shER $\alpha$ -36 and scrambled shRNA**

---

| Name                 | Targeting sequence    |
|----------------------|-----------------------|
| Scramble:            | TTCTCCGAACGTGTCACGT   |
| shER $\alpha$ -36-1: | GCAATTATTCCTTTGCCTTGC |
| shER $\alpha$ -36-2: | GCGTTGCATCATAACATAAGC |

---

**Table S2 Sequences of primers used in this study**

---

|                  |                                         |
|------------------|-----------------------------------------|
| ER $\alpha$ -36: | Forward: 5'-CAAGTGGTTTCCTCGTGTCTAAAG-3' |
|                  | Reverse: 5'-TGTTGAGTGTTGGTTGCCAGG-3'    |
| Nanog:           | Forward: 5'-ATTCAGGACAGCCCTGATTCTTC-3'  |
|                  | Reverse: 5'-TTTTTGCGACACTCTTCTCTGC-3'   |
| Oct4:            | Forward: 5'-GGACCGTTGGTTGTGAGTTGT-3'    |
|                  | Reverse: 5'-TGCTCCAGCTTCTCCTTCTC-3'     |
| Bmi1:            | Forward: 5'-GCTGCCAATGGCTCTAATGAA-3'    |
|                  | Reverse: 5'-TGCTGGGCATCGTAAGTATCTT-3'   |

$\beta$ -actin: Forward: 5'-TTGCGTTACACCCTTTCTTG-3'

Reverse: 5'-TTTGACCTTGCCACTTCCAC-3'

---

## Supplementary Figures

A

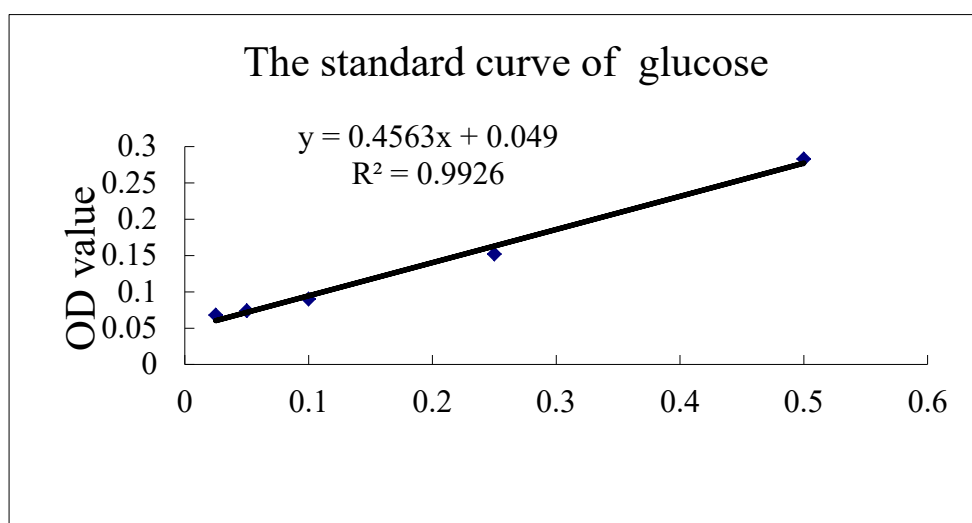

B

| Concentration | (mg/mL) | Absorbance |
|---------------|---------|------------|
|---------------|---------|------------|

---

|           |     |       |
|-----------|-----|-------|
| HP sample | 0.1 | 0.093 |
|-----------|-----|-------|

|              |        |
|--------------|--------|
| Purity of HP | 99.02% |
|--------------|--------|

---

**Figure S1. Determination of polysaccharide purity**

A. The standard curve of glucose. B. The percentage of polysaccharides.

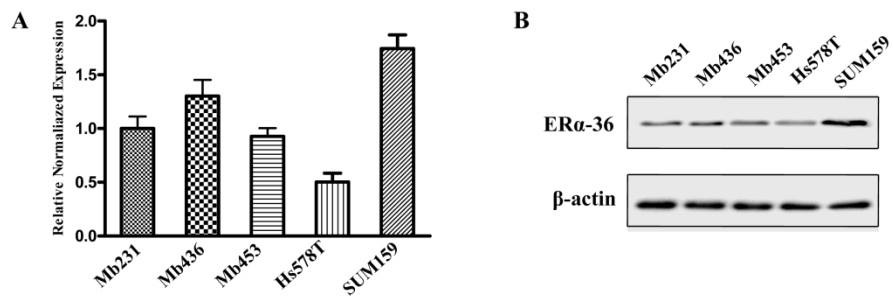

**Figure S2. The expression of ERα-36 in TNBC cells.**

A. ER $\alpha$ -36 expression at mRNA level in Mb231, Mb436, Mb453, Hs578T and SUM159 cells measured by qRT-PCR. B. ER $\alpha$ -36 expression at protein level in Mb231, Mb436, Mb453, Hs578T and SUM159 cells measured by western blot.

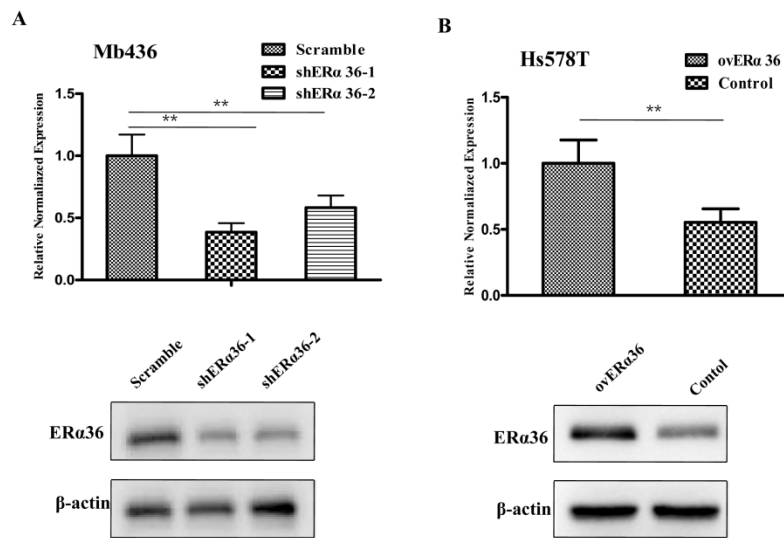

**Figure S3. The efficacy of ER $\alpha$ -36 knockdown and overexpression**

A. qRT-PCR and western blot assays showed the efficacy of ER $\alpha$ -36 knockdown in Mb436 cells.

B. qRT-PCR and western blot assays showed the efficacy of ER $\alpha$ -36 overexpression in Hs578T cells.
